# Supplementary material
Source: PubMed Central journal article supplement (PMC8550266)
Supplement: NIHMS1733065-supplement-Supplementary_Material_S1-S4.pdf [file NIHMS1733065-supplement-Supplementary_Material_S1-S4.pdf]

**Supplementary Table 1A.***Linear regression model predicting step length.*

|                      | <i>b</i> | <i>SE</i> | <i>t</i> | <i>p</i> | 95% CI        |
|----------------------|----------|-----------|----------|----------|---------------|
| Intercept            | 17.52**  | 4.16      | 4.22     | <.001    | [9.24, 25.80] |
| Test age             | 0.46     | 0.28      | 1.66     | .100     | [-0.09, 1.00] |
| Novice months        | 2.13**   | 0.69      | 3.09     | .003     | [0.76, 3.51]  |
| Experienced months   | 1.20**   | 0.31      | 3.90     | <.001    | [0.59, 1.82]  |
| Sample membership    | -0.40    | 1.97      | -0.20    | .841     | [-4.32, 3.53] |
| Novice × Sample      | -0.34    | 1.01      | -0.34    | .736     | [-2.35, 1.67] |
| Experienced × Sample | 0.12     | 0.40      | 0.29     | .771     | [-0.68, 0.91] |

*Note.* Months walking was split into two predictors based on the identified inflection points (less than and more than 3.9 months) for step length. Data for each measure of months walking were entered as separate variables to estimate effects of months walking before and after the inflection point. Adjusted  $R^2 = .46$ .

\*\* $p < .01$

**Supplementary Table 1B.***Linear regression model predicting step width.*

|                      | <i>b</i> | <i>SE</i> | <i>t</i> | <i>p</i> | 95% CI         |
|----------------------|----------|-----------|----------|----------|----------------|
| Intercept            | 16.56**  | 2.90      | 5.70     | <.001    | [10.78, 22.35] |
| Test age             | -0.21    | 0.20      | -1.06    | .295     | [-0.60, 0.19]  |
| Novice months        | -0.71    | 0.68      | -1.04    | .302     | [-2.07, 0.65]  |
| Experienced months   | -0.60*   | 0.23      | -2.56    | .013     | [-1.07, -0.13] |
| Sample membership    | -0.24    | 1.48      | -0.16    | .872     | [-3.18, 2.70]  |
| Novice × Sample      | -0.44    | 1.03      | -0.43    | .670     | [-2.49, 1.61]  |
| Experienced × Sample | 0.04     | 0.30      | 0.12     | .908     | [-0.57, 0.64]  |

*Note.* Months walking was split into two predictors based on the identified inflection points (less than and more than 2.5 months) for step width. Data for each measure of months walking were entered as separate variables to estimate effects of months walking before and after the inflection point. Adjusted  $R^2 = .23$ .

\*\* $p < .01$ , \* $p < .05$ .

**Supplementary Table 1C.***Linear regression model predicting speed.*

|                      | <i>b</i> | <i>SE</i> | <i>t</i> | <i>p</i> | 95% CI          |
|----------------------|----------|-----------|----------|----------|-----------------|
| Intercept            | 39.05    | 23.74     | 1.65     | .104     | [-8.25, 86.35]  |
| Test age             | 2.25     | 1.58      | 1.42     | .159     | [-0.90, 5.39]   |
| Novice months        | 17.17**  | 4.21      | 4.08     | <.001    | [-2.06, 0.66]   |
| Experienced months   | 8.12**   | 1.80      | 4.50     | <.001    | [4.52, 11.71]   |
| Sample membership    | 8.25     | 11.51     | 0.72     | .476     | [-14.68, 31.18] |
| Novice × Sample      | -9.93    | 6.11      | -1.63    | .108     | [-22.10, 2.23]  |
| Experienced × Sample | -0.74    | 2.33      | -0.32    | .753     | [-5.37, 3.90]   |

*Note.* Months walking was split into two predictors based on the identified inflection points (less than and more than 3.6 months) for step width. Data for each measure of months walking were entered as separate variables to estimate effects of months walking before and after the inflection point. Adjusted  $R^2 = .47$ .

\*\* $p < .01$ , \* $p < .05$ .

**Supplementary Table 2.***Multiple linear regression model predicting walk onset age.*

| Outcome         | Predictor            | <i>b</i> | <i>SE</i> | <i>z</i> | <i>p</i> |
|-----------------|----------------------|----------|-----------|----------|----------|
| Crawl onset age | Sample membership    | 1.39**   | 0.38      | 3.70     | <.001    |
| Walk onset age  | Sample membership    | 0.54     | 2.04      | 0.27     | .790     |
|                 | Crawl onset age      | 0.49**   | 0.18      | 2.78     | .005     |
|                 | Sample × Crawl onset | -0.03    | 0.23      | -0.14    | .887     |

*Note.* Outcome variables are entered as sequential paths. Adjusted  $R^2$  (Crawl onset age) = .17.

Adjusted  $R^2$  (Walk onset age) = .27.

\*\* $p < .01$

**Supplementary Table 3.***Multiple linear regression model predicting spontaneous locomotor activity.*

| Outcome           | Predictor         | <i>b</i> | <i>SE</i> | <i>z</i> | <i>p</i> |
|-------------------|-------------------|----------|-----------|----------|----------|
| Crawl onset age   | Sample membership | 1.53**   | 0.38      | 4.07     | <.001    |
| Walk onset age    | Crawl onset age   | 0.57**   | 0.10      | 5.71     | <.001    |
| % Session walking | Sample membership | 4.02**   | 1.48      | 2.71     | .007     |
|                   | Walk onset age    | -0.38    | 0.43      | -0.90    | .370     |
|                   | Months walking    | -0.36    | 0.31      | -1.17    | .241     |
| Step rate         | Sample membership | -8.65*   | 4.05      | -2.14    | .033     |
|                   | Walk onset age    | 2.13†    | 1.16      | 1.83     | .067     |
|                   | Months walking    | 1.92*    | 0.85      | 2.26     | .024     |
| % Short bouts     | Sample membership | 3.75     | 2.63      | 1.43     | .154     |
|                   | Walk onset age    | -1.25†   | 0.76      | -1.65    | .098     |
|                   | Months walking    | -0.22    | 0.55      | -0.40    | .692     |

*Note.* Outcome variables are entered as sequential paths. Adjusted  $R^2$  (% Session walking) = .12. Adjusted  $R^2$  (Step rate) = .16. Adjusted  $R^2$  (% Short bouts) = .06.

\*\* $p < .01$ , \* $p < .05$ , † $p < .10$ .

**Supplementary Table 4.***Multiple linear regression model predicting walking skill.*

| Outcome         | Predictor              | <i>b</i>           | <i>SE</i> | <i>z</i> | <i>p</i> |
|-----------------|------------------------|--------------------|-----------|----------|----------|
| Crawl onset age | Sample membership      | 1.57*              | 0.39      | 4.00     | <.001    |
| Walk onset age  | Crawl onset age        | 0.52*              | 0.11      | 4.67     | <.001    |
| Indoor space    | Sample membership      | 0.98               | 0.15      | 6.32     | <.001    |
| Step length     | Pre-inflection months  | 2.16**             | 0.54      | 4.01     | <.001    |
|                 | Post-inflection months | 1.58**             | 0.22      | 7.31     | <.001    |
|                 | Walk onset age         | 0.18               | 0.30      | 0.62     | .539     |
|                 | % Session walking      | -0.11              | 0.09      | -1.22    | .221     |
|                 | Step rate              | 0.01               | 0.03      | 0.43     | .666     |
|                 | % Short bouts          | -0.11*             | 0.05      | -2.38    | .017     |
|                 | Height %               | 0.03               | 0.03      | 1.13     | .259     |
|                 | Weight %               | -0.08              | 0.06      | -1.23    | .220     |
|                 | Weight-for-height %    | 0.08               | 0.05      | 1.52     | .128     |
|                 | Indoor space           | -1.50*             | 0.75      | -2.00    | .046     |
|                 | Outdoor space          | 3.71               | 8.16      | 0.45     | .649     |
|                 | Sample membership      | 1.31               | 1.35      | 0.97     | .332     |
| Step width      | Pre-inflection months  | -1.82**            | 0.48      | -3.77    | <.001    |
|                 | Post-inflection months | -1.96**            | 0.16      | -6.13    | <.001    |
|                 | Walk onset age         | -0.32 <sup>†</sup> | 0.19      | -1.68    | .093     |
|                 | % Session walking      | -0.12*             | 0.06      | -2.17    | .030     |
|                 | Step rate              | 0.01               | 0.02      | 0.39     | .699     |
|                 | % Short bouts          | 0.01               | 0.03      | 0.19     | .849     |
|                 | Height %               | -0.004             | 0.02      | -0.24    | .813     |
|                 | Weight %               | 0.06               | 0.04      | 1.63     | .103     |
|                 | Weight-for-height %    | -0.05              | 0.03      | -1.62    | .105     |
|                 | Indoor space           | 0.89*              | 0.44      | 2.01     | .044     |
|                 | Outdoor space          | -2.01              | 5.07      | -0.40    | .691     |
|                 | Sample membership      | -0.78              | 0.82      | -0.95    | .340     |

*Note.* Outcome variables are entered as sequential paths. Months walking was split into two predictors based on the identified inflection points (less than and more than 3.9 months for step length, less than and more than 2.5 months for step width). Data for each measure of months walking were entered as separate variables to estimate effects of months walking before and after the inflection points. Larger beta coefficients reflect stronger predictive power, while statistically adjusting for other measures. Beta coefficients should be interpreted as the change in cm of step length or step width for each “1-unit” change in the predictor (e.g., an additional month walking pre-inflection is associated with a 2.16 cm increase in step length; an additional person per room is associated with a 0.89 cm decrease in step width).

\*\**p* < .01, \**p* < .05, <sup>†</sup>*p* < .10.
